# Supplementary material for: Cobalt phthalocyanine sensitized MOF on MOF: UiO-66@MIL-88B(Fe)/CoTAPc, photocatalytic activity in the degradation of acid black 210
Source: Royal Society of Chemistry journal article supplement (doi:10.1039/d2ce01123a), 2022-01-01
Supplement: d2ce01123a1.pdf [file d2ce01123a1.pdf]

## Supporting Information

### **Cobalt phthalocyanine sensitized MOF on MOF: UiO-66@MIL-88B(Fe)/CoTAPc, photocatalytic activity in the degradation of Acid black 210**

Boyi Yan, Na Wang, Zhongqiao Sun, Yide Han, Hao Meng, Yan Xu, Xia Zhang\*

*Department of Chemistry, College of Sciences, Northeastern University, Shenyang*

*110819, P. R. China.*

\*Corresponding author.

Email: xzhang@mail.neu.edu.cn

## Materials

Iron nitrate hexahydrate ( $\text{Fe}(\text{NO}_3)_3 \cdot 9\text{H}_2\text{O}$ ,  $\geq 98.5\%$ ), sodium sulfate anhydrous ( $\text{Na}_2\text{SO}_4$ ,  $\geq 99.0\%$ ), ammonium molybdate ( $(\text{NH}_4)_6\text{Mo}_7\text{O}_{24} \cdot 4\text{H}_2\text{O}$ ,  $\geq 99.0\%$ ), ammonium chloride ( $\text{NH}_4\text{Cl}$ ,  $\geq 99.5\%$ ), L-ascorbic acid ( $\text{C}_6\text{H}_8\text{O}_6$ ,  $\geq 99.7\%$ ), N, N-dimethylformamide (DMF,  $\geq 99.5\%$ ) and glacial acetic acid ( $\text{CH}_3\text{COOH}$ ,  $\geq 99.5\%$ ) were purchased from Tianjin Damao Chemical Reagent Factory (China). p-Phthalic acid (PTA, 99.0%), cobalt chloride hexahydrate ( $\text{CoCl}_2 \cdot 6\text{H}_2\text{O}$ ), urea ( $\text{CH}_4\text{N}_2\text{O}$ , 99.0%) were obtained from Aladdin reagent Co. Ltd. (China). Absolute ethanol ( $\text{EtOH}$ ,  $\geq 99.7\%$ ), Isopropyl alcohol ( $(\text{CH}_3)_2\text{CHOH}$ ,  $\geq 99.7\%$ ) and acetonitrile ( $\text{CH}_3\text{CN}$ ,  $\geq 99.5\%$ ) were purchased from Tianjin Fuyu Fine Chemical Co. Ltd (China). Zirconium (IV) chloride ( $\text{ZrCl}_4$ , 99.5%), N-(3-Dimethylaminopropyl)-N'-ethylcarbodiimide hydrochloride ( $\text{C}_8\text{H}_{18}\text{ClN}_3$ , 98.5%), ammonium oxalate monohydrate ( $(\text{NH}_4)_2\text{C}_2\text{O}_4 \cdot \text{H}_2\text{O}$ , 99.8%), N-hydroxysuccinimide ( $\text{C}_4\text{H}_5\text{NO}_3$ , 99%), acid Black 210 ( $\text{C}_{34}\text{H}_{25}\text{K}_2\text{N}_{11}\text{O}_{11}\text{S}_3$ , 100%), 4-nitrophthalic acid ( $\text{C}_8\text{H}_5\text{NO}_6$ , 98.0%) and sodium sulfide nonhydrate ( $\text{Na}_2\text{S} \cdot 9\text{H}_2\text{O}$ ,  $\geq 98.0\%$ ) were purchased from Shanghai Macklin Biochemical Co. Ltd (China). Sodium hydroxide ( $\text{NaOH}$ ,  $\geq 96.0\%$ ) and hydrochloric acid ( $\text{HCl}$ ) were obtained from Tianjin Yongda Chemical Reagent Co. Ltd. (China).
